# Supplementary material for: Low Energy Availability with and without a High-Protein Diet Suppresses Bone Formation and Increases Bone Resorption in Men: A Randomized Controlled Pilot Study
Source: PubMed Central journal article supplement (PMC8000240; doi:10.3390/nu13030802), 2021-02-28

**Figure S1: CONSORT 2010 Flow Diagram**

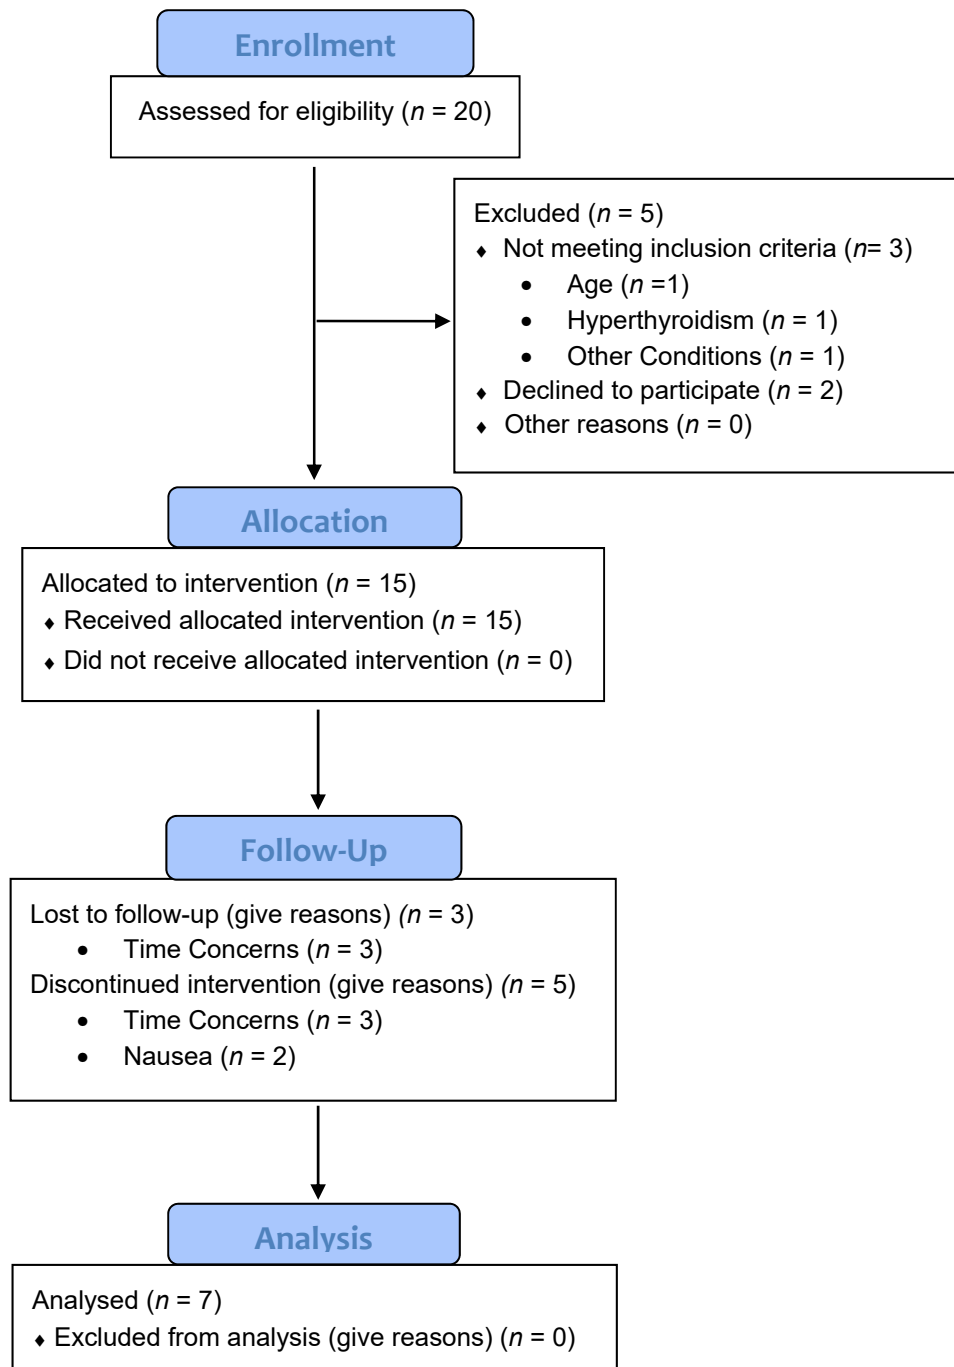

Supplement: nutrients-13-00802-s001.pdf [file nutrients-13-00802-s001.pdf]
